# 1 **stuart: an R package for the curation of SNP genotypes from experimental crosses**

2

## 3 **Authors**

4 **Marie Bourdon<sup>1</sup>, Xavier Montagutelli<sup>1</sup>**

5

6 1 Institut Pasteur, Université Paris Cité, Mouse Genetics Laboratory, Paris, France

7 Correspondance : [xavier.montagutelli@pasteur.fr](mailto:xavier.montagutelli@pasteur.fr)

8

## 9 ORCID numbers

10 Marie Bourdon: 0000-0002-6184-1888

11 Xavier Montagutelli: 0000-0002-9372-5398

12

## 13 Keywords

14 R-package, genetic analysis, SNP genotypes

15

## 16 Abstract

17 Genetic mapping in two-generation crosses requires genotyping, usually performed with SNP  
18 markers arrays which provide high-density genetic information. However, genetic analysis on raw  
19 genotypes can lead to spurious or unreliable results due to defective SNP assays or wrong genotype  
20 interpretation. Here we introduce stuart, an open-source R package which analyzes raw genotyping  
21 data to filter SNP markers based on informativeness, Mendelian inheritance pattern and consistency  
22 with parental genotypes. Functions of this package provide a curation pipeline and formatting  
23 adequate for genetic analysis with the R/qtl package. stuart is available with detailed documentation  
24 from <https://gitlab.pasteur.fr/mouselab/stuart/>.

## 25 Introduction

26 Genetic mapping of Mendelian or quantitative traits in inbred strains is classically achieved in two-  
27 generation crosses such as intercrosses (F2) and backcrosses (N2), in which the inheritance of the  
28 trait is compared with the genotypes at multiple genetic markers encompassing the genome map.  
29 Variations of a quantitative trait are controlled by one or more quantitative trait loci (QTL). A QTL is  
30 defined as a marker at which individuals carrying different genotypes show different average trait  
31 values. QTL mapping searches for QTLs by testing association between trait values and genotypes at  
32 markers spanning the genome map. The statistical significance of the association is expressed as  
33 logarithm of the odds (LOD) score which is calculated for each genotyped marker and, at  
34 intermediates positions, for pseudomarkers created by interval mapping, generating a LOD score  
35 curve (Broman 2001). The curve peaks at regions potentially associated with the trait. These peaks  
36 are called QTLs if they reach predefined statistical thresholds established either from general  
37 statistical models (Lander and Kruglyak 1995) or by permutation tests performed on the cross data.

For each permutation, phenotypes are shuffled between individuals to break real associations, and LOD scores are calculated to identify peaks, which are all false positives. The distribution of the peak LOD scores over a large number (>1000) of permutations provides statistical thresholds: if a LOD score of 3.8 or higher is observed in 5% of the permutations, this value will be taken as the  $p=0.05$  threshold (Doerge and Churchill 1996). QTL mapping on F2s and N2s can be conducted with R packages such as R/qtl (Broman *et al.* 2003) and R/qtl2 (Broman *et al.* 2019).

44

With genome sequencing, single nucleotide polymorphisms (SNPs) have become the standard across species for their very high frequency, low cost and high-throughput analysis using various genotyping platforms. In mice, several generations of Mouse Universal Genotyping Arrays (MUGA) have been developed, the most recent being GigaMUGA (143k SNPs (Morgan *et al.* 2015)) and MiniMUGA (10.8k SNPs (Sigmon *et al.* 2020)). GigaMUGA provides high-density coverage for the fine characterization of inbred strains or outbred populations such as the Diversity Outbred (Svenson *et al.* 2012), while the modest number of SNPs in MiniMUGA is largely sufficient to genotype intercrossed or backcrossed individuals. However, SNP reliability is affected by the performance of genotyping platforms and polymorphism between and within inbred strains. Spurious or unreliable mapping outputs can result from defective SNP assays or wrong genotype interpretations. Therefore, raw data obtained from genotyping services must be curated before performing genetic analyses.

Several tools exist for quality control of SNP genotyping arrays, including Illumina's GenomeStudio. R packages such as argyle (Morgan 2016) analyze hybridization intensity signals from MUGA arrays. The simple genetic structure of two-generation crosses provides specific and efficient means for identifying spurious genotyping data, such as consistency with parental genotypes and expected Mendelian proportions. The R/qtl package includes functions to build genetic maps and check for genotype consistency (<https://rqt.org/tutorials/geneticmaps.pdf>). However, this control is performed once genotypes have been imported and involves multiple steps of manual curation. To provide a more automated process of data curation before genetic analysis, we have developed stuart, an R package which implements a pipeline for automatic filtering and curation of SNP genotyping data from two-generation crosses based on simple rules. This package formats raw SNP allele calls from Illumina files into genotypes ready for importation in R/qtl. Using three intercross datasets, we illustrate the consequences of inconsistent genotypes on the estimated marker map and QTL mapping, and how the curation achieved by each function in stuart leads to trustable results.

71

## 72 **Materials and Methods**

stuart is a tidyverse (Wickham *et al.* 2019) based R package requiring R version 3.5.0 or later. Its open source is available on Institut Pasteur's GitLab: <https://gitlab.pasteur.fr/mouselab/stuart/> and can be installed with devtools (Wickham *et al.* 2021). stuart's vignette provides detailed descriptions of data import and of each function.

stuart imports SNP allele calls from MUGA Illumina platform or other sources using the same file format. The central object of stuart is the marker table which summarizes for each marker the alleles found in the population, the number of individuals of each genotype and the exclusion status resulting from the curation steps. stuart exports curated data to an R/qtl compatible format. The

81 SNP annotation file used was downloaded from  
82 [https://raw.githubusercontent.com/kbroman/MUGAarrays/master/UWisc/mini\\_uwisc\\_v2.csv](https://raw.githubusercontent.com/kbroman/MUGAarrays/master/UWisc/mini_uwisc_v2.csv).

83 Three datasets were used to test the package. This article presents the results from 176 (CC001/Unc  
84 X C57BL/6J-*Ifnar1* KO) F2 mice (dataset 1). The analysis of two other data sets, 94(C57BL/6J-*Ifnar1*  
85 KO X 129S2/SvPas-*Ifnar1* KO) F2 mice (dataset 2) and 89 (C57BL/6NCrI X CC021/Unc) F2 mice  
86 (dataset 3) is presented as supplementary data. Quantitative traits were studied in the three F2s.  
87 Phenotype distributions are presented in Supplementary Figure 1. Genotyping was performed by  
88 Neogen (Auchincruive, Scotland) with MiniMUGA on DNA prepared from tail biopsies using standard  
89 phenol-chloroform extraction. Genotype call rate was 0.927, 0.931 and 0.948 for dataset 1, dataset 2  
90 and dataset 3, respectively. QTL mapping was performed using R/qtl. The following thresholds were  
91 used, as commonly accepted (Members of the Complex Trait Consortium 2003):  $p=0.05$  for  
92 significant association,  $p=0.1$  and  $p=0.63$  for suggestive association. All figures were designed with  
93 ggplot2 (Wickham 2016) or R/qtl.

94

## 95 **Results and discussion**

### 96 **Consequences of inconsistent genotypes**

97 SNP data delivered by the Illumina platform are base alleles that need to be translated into  
98 genotypes for genetic analysis. From our experience on multiple two-generation crosses, we  
99 identified several types of genotype inconsistencies which were responsible for distorted marker  
100 maps and spurious QTL mapping results. Recombination fraction (RF), which measures the genetic  
101 distance between two markers, is estimated in a cross by analyzing proportion of recombinants  
102 between adjacent markers in all individuals. The map of markers calculated from the cross data  
103 should be consistent with their known positions. The R/qtl `est.map()` and `plotMap()` functions  
104 produce a graphical comparison of the two maps (Figure 1A and Supplementary Figure 2A-B). For  
105 each chromosome, the known position of each marker provided in the annotation file (left) is  
106 connected with the estimated position (right) based on observed RF. With minimally curated  
107 genotypes (exclusion of non-polymorphic markers and markers with over 50% missing genotypes),  
108 large RF were found in many instances between closely linked markers, resulting in fan-like patterns.  
109 To further describe these distortions, we computed the distribution of the ratio between the  
110 calculated and the known genetic distances between adjacent markers (Figure 1B and  
111 Supplementary Figure 2C-D; to avoid exaggerated ratios, we considered only markers with a known  
112 distance of 1cM or more). This analysis revealed two groups of markers. In dataset 1, for 43%  
113 percent of them, the ratio was below 5 and followed a Gaussian distribution with mean = 1.31 and  
114  $sd = 0.77$ . The other markers (57%) showed a ratio between 5 and 981.87 (Figure 1B) which  
115 necessarily results from incorrect genotypes, as only a few individuals should show recombination  
116 between adjacent markers. On chromosome 1, while the known marker positions spanned ~100 cM,  
117 the cumulated genetic distance estimated from observed RF was ~40,000cM. As QTL mapping relies  
118 on coherent genotypes at a series of markers encompassing a genetic interval, problematic  
119 genotypes at a given marker will perturb the analysis and, in some cases, may result in peaks of the  
120 LOD score curve in the absence of true association (Cheung *et al.* 2014). Such false positives increase  
121 significance thresholds calculated by data permutation.

122 These two consequences of genotyping inconsistencies are illustrated in Figure 1C and  
123 Supplementary Figure 3A-B which were obtained using the R/qtl `scanone()` function on a  
124 quantitative trait from the uncured F2 datasets. For dataset 1, the  $p=0.05$  significance threshold

was estimated at 19.4 (Figure 1C), while it usually ranges between 3.3 and 4.3 depending on the inheritance model for crosses of this type and size (Lander and Kruglyak 1995). Several peaks were detected although none reached  $p=0.05$  significance. Moreover, their narrow profile was highly unexpected in F2 crosses. Indeed, these peaks involved only one to three markers, and the LOD score curve felt abruptly between these and adjacent markers on both sides (Figure 1D), while genetic linkage between closely linked markers should result in progressive decrease of the LOD score curve on both sides of a peak (Guénet *et al.* 2015). Among the three datasets, we identified four narrow peaks reaching suggestive significance level ( $p<0.63$ ): two were located at a marker with non-Mendelian allelic proportions and two were located at one to three pseudomarkers adjacent to a marker with non-Mendelian proportions (Supplementary Figure 3C-D and E-F, respectively). We identified 5 other narrow peaks (LOD score between 6.72 and 10.03) out of which four resulted from the same situations as above and one was located on a pseudomarker and a marker with non-Mendelian proportions.

Inconsistent marker maps may also originate from the wrong assignment of markers to their chromosome and position provided to the mapping program. Indeed, R/qtl developer K. Broman identified errors in MUGA arrays annotation files affecting marker positions, probe sequences mapping to several locations and unmappable markers. We recommend using K. Broman's corrected annotation files available on GitHub. The conversion of SNP alleles (A, C, T, G) observed in second-generation individuals (SGIs) to genotypes encoded according to the parental alleles may also create genotype errors. Reference SNP alleles established for many mouse strains may be used to infer the SGI genotypes. However, we recommend genotyping individuals of the parental strains used in the cross since they could differ from the reference panel. In our example dataset, the two parental strains used in the cross showed allelic differences with their reference panel counterpart at 200 markers.

#### Data control and curation performed in stuart

Although each of stuart's functions can be called independently, we present a logical analysis workflow appropriate for two-generation crosses. Table 1 summarizes the data curation and filtering performed by each function, and the number of markers of dataset 1 retained after each step.

#### *Data importation*

Genetic mapping requires both genotype and phenotype data. Required formats and instructions are detailed in the vignette (see example of phenotype data in Supplementary Table S1). Parental strains' genotyping data can be loaded from the same genotyping results as the SGI, from a previous genotyping file or from a reference file. Annotation data from K. Broman can be imported directly from GitHub. The `geno_strains()` function formats parental genotypes from a two-allele encoding in Illumina format into a single letter encoding, and merges this data with the annotation table into a table with parental allele and marker positions.

#### *Consistency between parents and SGI alleles and genotypes*

Several generations of MUGA arrays have been developed (Mega, Giga, Mini), each with successive versions differing by multiple SNP markers. If parental and SGI data were produced on different versions, the marker lists must be compared to retain only common SNPs. This is achieved by the `mark_match()` function.

Converting alleles into genotypes requires that SGI segregate for the two parental alleles, and that each allele is found only in one parent. The aim of the `mark_allele()` function is to control consistency of allele's origin at multiple levels.

First, this function excludes markers with missing data in both parents. If allele data is available for only one parent and this allele is also found in SGI, the other allele present in SGI will be assigned to the parent with missing allele. However, this imputation is not error-free since we have observed, in rare occasions, markers which alleles were identical in the parental strains but were polymorphic in the SGI (Table 2 for such SNPs in dataset 1). This situation may occur when the parental strains used in the cross have diverged from those of the reference panel, or if one parent is heterozygous. Such markers will be excluded by the `mark_allele()` function but they could escape detection if allele information was missing in one parent. Adding the `parNH=FALSE` argument to the `mark_allele()` function will exclude markers missing one parental allele or for which one parent is heterozygous. However, while preventing rare errors, this option will also exclude a number of truly informative markers.

The `mark_allele()` function also discards markers at which parents and SGI carry different alleles, and, for backcrosses, markers for which some SGI are homozygous for the wrong allele.

### *Non-polymorphic markers*

Genetic analysis requires polymorphic markers, i.e., for which parents carry different alleles which segregate in the SGI. The `mark_poly()` function excludes markers for which all genotyped SGI carry the same allele, which saves computation time.

### *Missing genotypes*

Reliable QTL mapping results depend on markers with medium to high rate of successful genotyping. Figure 2A shows markers distribution based on the proportion of missing genotypes. For over 95% of markers genotyping rate was above 50%. Genotyping failures may result from poor-quality genotyping assay. The `mark_na()` function excludes such poorly-genotyped markers.

### *Mendelian proportions*

In two-generation crosses between inbred strains, the proportions of the two or three classes of genotypes are predictable, i.e., for autosomes, 25% of each type of homozygotes and 50% of heterozygotes in an intercross, and 50% of homozygotes and 50% of heterozygotes in a backcross. Comparing the observed proportions with these expectations provides another criterion of filtering.

The `mark_prop()` function filters markers based either on a minimum proportion of each genotype, or on the statistically significant departure from the expected proportions (Chi2 test, with a p-value threshold). Figure 2B shows the exclusions of the autosomal markers depending on the proportion of each genotype. X chromosome genotypic proportions differ from autosomes, therefore, different arguments of `mark_prop()` function are used to filter X-linked markers for more precise curation.

### *Filtering report and impact on QTL mapping results*

At every step, the markers filtered out are annotated in a marker table which can be exported for further inspection. The last column of Table 1 shows the number of markers retained after each step in the example dataset 1. Most of the starting markers (7180/11125 = 65%) which were eventually removed by Stuart's functions were removed by `mark_poly()` as non-polymorphic, a ratio expected for crosses between two standard mouse inbred strains (Frazer *et al.* 2007). `mark_allele()` rejected 750 markers, `mark_na()` 457 and `mark_prop()` 484. Across the three datasets, we found 1546

markers with either non-Mendelian proportions or allele inconsistencies between parental strains and SGIs. Overall, 619 of them were retained by stuart's filtering in at least one of the other crosses, ruling out their misassignment to the genetic map. Out of the residual markers, 85 were removed from all datasets for another criterion than absence of polymorphism and were therefore considered as unreliable.

At this step, the dataset may still contain markers showing high recombination fractions with adjacent markers either for a reason not tested by the current version of stuart or due to the parameters used in mark\_na() and mark\_prop() functions. These markers can be identified by calculating the estimated map using R/qtl est.map() and using stuart's mark\_estmap() function which excludes markers presenting high recombination fractions with adjacent markers. Over the 3 datasets, 9 markers were removed by mark\_estmap(). Five of them were retained in at least one other dataset, indicating the problem was dataset specific. Finally, for dataset 1, 2251 markers passed all steps resulting in an average genetic interval between adjacent markers lower than 2 cM, which is largely sufficient to perform QTL mapping (Darvasi *et al.* 1993). After curation, phenotype and genotype data are combined and exported in the R/qtl format using the write\_rqtl() function. The qtl2convert package (Broman 2021) converts this output into the adequate format required by the more recent R/qtl2 package.

Figure 3A and Supplementary Figure 4A-B show the marker maps calculated after data curation with stuart. The known marker map and the estimated genetic map are consistent, with minimal expansions or contractions. Large ratios between the calculated and the known genetic distances between adjacent markers have been eliminated (Figure 3B, Supplementary Figure 4C-D). QTL mapping analysis on curated dataset 1 is shown on Figure 3C (to be compared with Figure 1C; see Supplementary Figure 5 for datasets 2 and 3). LOD thresholds are in the expected range for an F2, and the LOD score curve reveals broader peaks than in Figure 1B, with progressive LOD score decrease on both sides of the peak marker. One significant and three suggestive QTLs were identified on chromosomes 12 (p-value = 0.037, Figure 3D), 5 (p-value = 0.460), 10 (p-value = 0.157) and 15 (p-value = 0.244) which were not visible using non-curated data due to very high LOD score thresholds.

Being very simple to use and efficient at curating genotyping errors, stuart will facilitate the use of genotyping arrays for genetic mapping purposes in two-generation crosses, bridging the gap between raw allele data produced by SNP platforms and genetic analysis software. Moreover, its functions can be used independently to analyze inbred strains genotypes. For example, geno\_strain() creates a genotype consensus between two or more individuals of the same strain suitable for further inspection, which can be useful when genotyping or regenotyping a strain of interest. Comparing genotyping results of an inbred strain after several generations of breeding with mark\_allele() will readily identify variants that have emerged or been selected over time. Likewise, this function will help identifying genetic variants between substrains.

## Web resources

The source code of the stuart package and the code used for the figures of this article are publicly available from <https://gitlab.pasteur.fr/mouselab/stuart/>.

## Data availability statement

All datasets used as examples in this article are available from <https://gitlab.pasteur.fr/mouselab/stuart/>. Dataset 1 is included in the package and can be loaded once the package is loaded (see the vignette for details). The two other datasets are available from GitLab in the “article” directory in separate folders (i.e. “data2” and “data3”). Each folder contains the genotypes of the SGIs in file “geno\_dataX.csv”, the phenotypes of the SGIs in file “pheno\_dataX.csv”, the parental strains’ genotypes in file “parents\_dataX.csv” and the reference genotypes for the parental strains in file “ref\_geno\_dataX.csv”. Analysis of each cross is in each folder in an R markdown file (“dataX.Rmd”).

## Acknowledgements

We thank Elise Jacquemet of the Pasteur Institute Bioinformatics and Biostatistics HUB for helping with the use of GitLab.

## Conflict of interest

The authors declare no conflicting interests.

## Funder information

This project was funded by the French Government's Investissement d'Avenir programme, Laboratoire d'Excellence “Integrative Biology of Emerging Infectious Diseases” (grant n°ANR-10-LABX-62-IBEID).



# 273     **Literature cited**

- 274     Broman, K. W., 2021 *qtl2convert: Convert Data among QTL Mapping Packages*.
- 275     Broman, K. W., 2001 Review of statistical methods for QTL mapping in experimental crosses. *Lab*
- 276             *Anim* (NY) 30: 44–52.
- 277     Broman, K. W., D. M. Gatti, P. Simecek, N. A. Furlotte, P. Prins *et al.*, 2019 R/qtl2: Software for
- 278             Mapping Quantitative Trait Loci with High-Dimensional Data and Multiparent Populations.
- 279             *Genetics* 211: 495–502.
- 280     Broman, K. W., H. Wu, S. Sen, and G. A. Churchill, 2003 R/qtl: QTL mapping in experimental crosses.
- 281             *Bioinformatics* 19: 889–890.
- 282     Cheung, C. Y. K., E. A. Thompson, and E. M. Wijsman, 2014 Detection of Mendelian Consistent
- 283             Genotyping Errors in Pedigrees: Detection of Genotyping Errors. *Genet. Epidemiol.* 38: 291–
- 284             299.
- 285     Darvasi, A., A. Weinreb, V. Minke, J. I. Weller, and M. Soller, 1993 Detecting marker-QTL linkage and
- 286             estimating QTL gene effect and map location using a saturated genetic map. *Genetics* 134:
- 287             943–951.
- 288     Doerge, R. W., and G. A. Churchill, 1996 Permutation Tests for Multiple Loci Affecting a Quantitative
- 289             Character. *Genetics* 142: 285–294.
- 290     Frazer, K. A., E. Eskin, H. M. Kang, M. A. Bogue, D. A. Hinds *et al.*, 2007 A sequence-based variation
- 291             map of 8.27 million SNPs in inbred mouse strains. *Nature* 448: 1050–1053.
- 292     Guénet, J. L., F. Benavides, J.-J. Panthier, and X. Montagutelli, 2015 *Genetics of the Mouse*.
- 293     Lander, E., and L. Kruglyak, 1995 Genetic dissection of complex traits: guidelines for interpreting and
- 294             reporting linkage results. *Nat Genet* 11: 241–247.
- 295     Members of the Complex Trait Consortium, 2003 The nature and identification of quantitative trait
- 296             loci: a community’s view. *Nat Rev Genet* 4: 911–916.
- 297     Morgan, A. P., 2016 argyle: An R Package for Analysis of Illumina Genotyping Arrays. *G3*
- 298             *Genes|Genomes|Genetics* 6: 281–286.



299 Morgan, A. P., C.-P. Fu, C.-Y. Kao, C. E. Welsh, J. P. Didion *et al.*, 2015 The Mouse Universal  
300 Genotyping Array: From Substrains to Subspecies. *G3 (Bethesda)* 6: 263–279.

301 Sigmon, J. S., M. W. Blanchard, R. S. Baric, T. A. Bell, J. Brennan *et al.*, 2020 Content and Performance  
302 of the MiniMUGA Genotyping Array: A New Tool To Improve Rigor and Reproducibility in  
303 Mouse Research. *Genetics* 216: 905–930.

304 Svenson, K. L., D. M. Gatti, W. Valdar, C. E. Welsh, R. Cheng *et al.*, 2012 High-Resolution Genetic  
305 Mapping Using the Mouse Diversity Outbred Population. *Genetics* 190: 437–447.

306 Wickham, H., 2016 *ggplot2: Elegant Graphics for Data Analysis*. Springer-Verlag New York.

307 Wickham, H., M. Averick, J. Bryan, W. Chang, L. McGowan *et al.*, 2019 Welcome to the Tidyverse.  
308 *JOSS* 4: 1686.

309 Wickham, H., J. Hester, W. Chang, and J. Bryan, 2021 *devtools: Tools to Make Developing R Packages*  
310 *Easier*.

311

312

**Table 1 – stuart analysis pipeline and application to dataset 1**

| Steps                                                        | Function                                                  | Excluded markers                                                                                                                                                                                                                 | Number of markers retained |
|--------------------------------------------------------------|-----------------------------------------------------------|----------------------------------------------------------------------------------------------------------------------------------------------------------------------------------------------------------------------------------|----------------------------|
| 1. Import SGI alleles from MUGA arrays                       | read.table()/read_tsv()                                   | -                                                                                                                                                                                                                                | 11125                      |
| 2. Add data from parental strain                             |                                                           |                                                                                                                                                                                                                                  |                            |
| Genotyped with SGI: make consensus                           | geno_strains()                                            | -                                                                                                                                                                                                                                | -                          |
| Imported from another dataset: import and make consensus     | read.table()/read_tsv(),<br>geno_strains                  | -                                                                                                                                                                                                                                | -                          |
| Imported from reference                                      | read.table()/other readr function depending on the format | -                                                                                                                                                                                                                                | -                          |
| 3. Filter on allele consistency between parents and SGI      |                                                           |                                                                                                                                                                                                                                  |                            |
| Same set of markers between parents and SGI                  | mark_match()                                              | Not present in both parents and SGI                                                                                                                                                                                              | 11125                      |
| Alleles consistent between parents and SGI                   | mark_allele                                               | Missing alleles in both parents<br>Not polymorphic in parents but polymorphic in SGI<br>Different alleles in parents and SGI<br>In backcrosses: homozygotes for the wrong allele<br>Optional: one parent missing or heterozygous | 10375                      |
| 4. Exclude markers with high proportion of missing genotypes | mark_na()                                                 | >50% of missing genotypes by default                                                                                                                                                                                             | 9918                       |
| 5. Exclude non-polymorphic markers in SGI                    | mark_poly()                                               | Non polymorphic in SGI                                                                                                                                                                                                           | 2738                       |
| 6. Verify mendelian proportions                              | mark_prop()                                               | Departure from expected Mendelian segregation (proportion of each class or statistical threshold)                                                                                                                                | 2254                       |
| 7. Verify recombination fraction between markers             | est.map() followed by mark_estmap()                       | High recombination fractions with adjacent markers                                                                                                                                                                               | 2251                       |

**Table 2 – Markers of dataset 1 non polymorphic between parental strains but polymorphic in SGI**

| Marker       | Allele parent 1 | Allele parent 2 | Allele SGI 1 | Allele SGI 2 |
|--------------|-----------------|-----------------|--------------|--------------|
| S6J017555686 | C               | C               | T            | C            |
| S6J113080150 | G               | G               | A            | G            |
| gJAX00038569 | C               | C               | T            | C            |
| mUNC21540855 | C               | C               | A            | C            |
| gUNC21555204 | T               | T               | T            | C            |
| gUNC21596600 | A               | A               | A            | G            |

## Figure legends

### Figure 1

Analysis of the dataset 1 illustrating the consequences of genotyping errors and inconsistencies on QTL mapping. Non-polymorphic markers and markers with more than 50% missing genotypes were excluded to avoid excessive calculation time. A: comparison of the known marker map (left) and the genetic map estimated from observed RF (right), as calculated by `est.map()` and represented by `plotMap()` functions of R/qtl. Lines connect the positions of each marker in the two maps. The estimated map is considerably expanded because of multiple genotype inconsistencies. B: distribution of the ratio between estimated and known distances between adjacent markers. Markers with known and calculated distances below 1cM were removed as they may lead to extremely small or large ratios. The expansion of the estimated map leads to a distribution tail of high ratios. The y-axis is in logarithmic scale. 57% of markers have a ratio above 5 (dashed line). C: output of the `scanone` function of R/qtl showing the identification of narrow LOD score peaks. Significance thresholds are shown as plain ( $p=0.05$ ), dotted ( $p=0.1$ ) and dashed ( $p=0.63$ ) lines. D: magnification of the `scanone` plot restricted to chromosome 13 (peak p2). The LOD score peak is located on one marker (red tick) distant by 1.728 cM and 1.24 cM from the proximal and distal markers, respectively, on the known marker map, but by 1001.582 cM and 1001.506 cM based on calculated RF.

### Figure 2

A: Distribution of the markers by their proportion of missing genotype (NA) in dataset 1. The y-axis is in logarithmic scale. 4.63% of markers have >50% missing genotypes. B: Exclusion of markers depending on genotypic proportions in dataset 1. Markers on X and Y chromosomes and mitochondrial DNA are not represented. The two axes represent the proportions of the two types of homozygous individuals in the intercross: AA and BB. Each dot represents a marker. Markers were excluded (red) if the proportion of at least one of the three genotypes (AA, AB and BB) was less than 10%, i.e. outside the triangle defined by the three dashed lines ( $AA=0.1$ ,  $BB=0.1$  and  $AA+BB=0.9$ ). Blue arrows point at two markers excluded due to a proportion of heterozygotes <10%.

### Figure 3

Analysis of dataset 1 after curation of genotyping data by `stuart` using the `mark_match()`, `mark_allele()`, `mark_na()`, `mark_poly()`, `mark_prop()`, and `mark_estmap()` functions. Refer to Figure 1 for comparison with original data. A: the estimated marker map is now consistent with the known marker map. Despite some contraction or expansion of specific intervals, the genome length of the observed marker map for each chromosome is consistent with the known map (ratio between the calculated and the known length of the genome:1.12). B: distribution of the ratio between estimated and known distance between adjacent markers. Markers with known and calculated distances below 1cM were removed as they may lead to extremely small or large ratios. Ratios are normally distributed with mean=1.33 and sd=0.81 showing consistency between the known and estimated maps. C: The LOD score curve shows several peaks, one of which is significant at  $P<0.05$  (plain line). Note that the significance thresholds are much lower than in Figure 1C. None of the peaks shown in Figure 1C were confirmed after data curation. Conversely, none of the peaks above  $P=0.63$  (dashed

362 line) found after data curation had been detected in Figure1C. D: magnification of the QTL peak  
363 identified on chromosome 12, showing progressive decrease of the LOD score curve over a large  
364 genetic interval. The marker with the highest LOD score is identified with a red tick.  
365

## Supplementary data

## Supplementary Table 1

Format of the phenotype data. First column: individual's number. Second column: individual's sex. Following columns: traits and covariates (individual's age, phenotype)

## Supplementary Figure 1

Distribution of the quantitative phenotypes analyzed in the three datasets.

## Supplementary Figure 2

Analysis of datasets 2 and 3 illustrating the expansion of the estimated genetic maps. Non-polymorphic markers and markers with more than 50% missing genotypes were excluded to avoid excessive calculation time. A, B: comparison of the known marker map (left) and the genetic map estimated from observed RF (right), as calculated by `est.map()` and represented by `plotMap()` functions of R/qtl in dataset 2 (A) and dataset 3 (B). Lines connect the positions of each marker in the two maps. The estimated map is considerably expanded because of multiple genotype inconsistencies. C, D: distribution of the ratio between estimated and known distance between adjacent markers. Markers with known and calculated distances below 1cM were removed as they may lead to extremely small or large ratios. The expansion of the estimated map leads to a distribution tail of high ratios. The y-axis is in logarithmic scale. 51% of the markers in the dataset 2 (C) and 16% of the markers in the dataset 3 (D) have a ratio above 5 (dashed line).

## Supplementary Figure 3

Analysis of datasets 2 and 3 illustrating the identification of narrow LOD-score peaks. A, B: output of the `scanone()` function of R/qtl in the datasets 2 (A) and 3 (B) showing the identification of two narrow suggestive peaks. C: peak p1 from dataset 1 (see Figure 1C) is located on a single marker (mUNC050096588, red tick) with non-Mendelian proportions. Peak p2 from dataset 1 shows the same pattern. D: genotypes at mUNC050096588. HM1 and HM2: homozygotes; HT: heterozygotes; NA: missing genotypes. E: peak p3 from dataset 2 is located on a pseudomarker adjacent to a marker with non-Mendelian proportions (SNT111392585, red tick). Peak p4 from dataset 3 shows the same pattern. F: genotypes at SNT111392585.

## Supplementary Figure 4

Analysis of the estimated genetic map in datasets 2 (A) and 3 (B) after curation of genotyping data by `stuart`. Refer to Supplementary Figure 2 for comparison with original data. The estimated marker maps are now consistent with the known marker maps with similar genome length despite local contractions and expansions (the ratio between the calculated and the known length of the genome is 1.00 for dataset 2 and 0.96 for dataset 3). The ratios between estimated and known distance between adjacent markers in dataset 2 (C) and dataset 3 (D) are now normally distributed with a mean=1.27 and a sd=0.77 for dataset 2 and a mean=1.24 and a sd=0.61 for dataset 3. The x-axis is in logarithmic scale.

## Supplementary Figure 5

Analysis of the LOD score curve after curation of genotyping data by `stuart` in datasets 2 (A) and 3 (B). Refer to Supplementary Figure 3 for comparison with original data. Significance thresholds are

407 much lower than before curation. One peak in dataset 2 is significant at  $P < 0.05$  (plain line) and none  
408 of the peaks observed before data curation (Supplementary Figure 3) were confirmed after curation  
409 with stuart. Dotted line:  $P = 0.1$ . Dashed line:  $P = 0.63$ .

410



**A**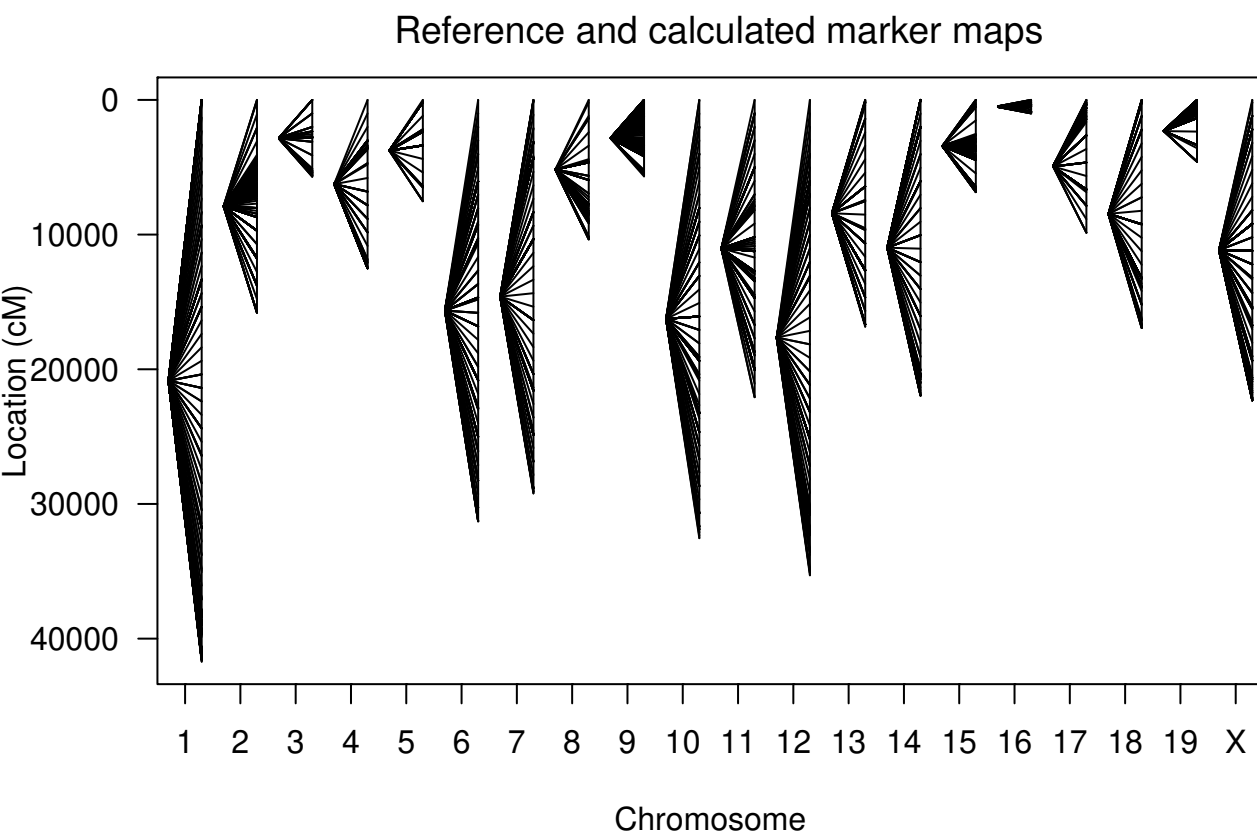**B**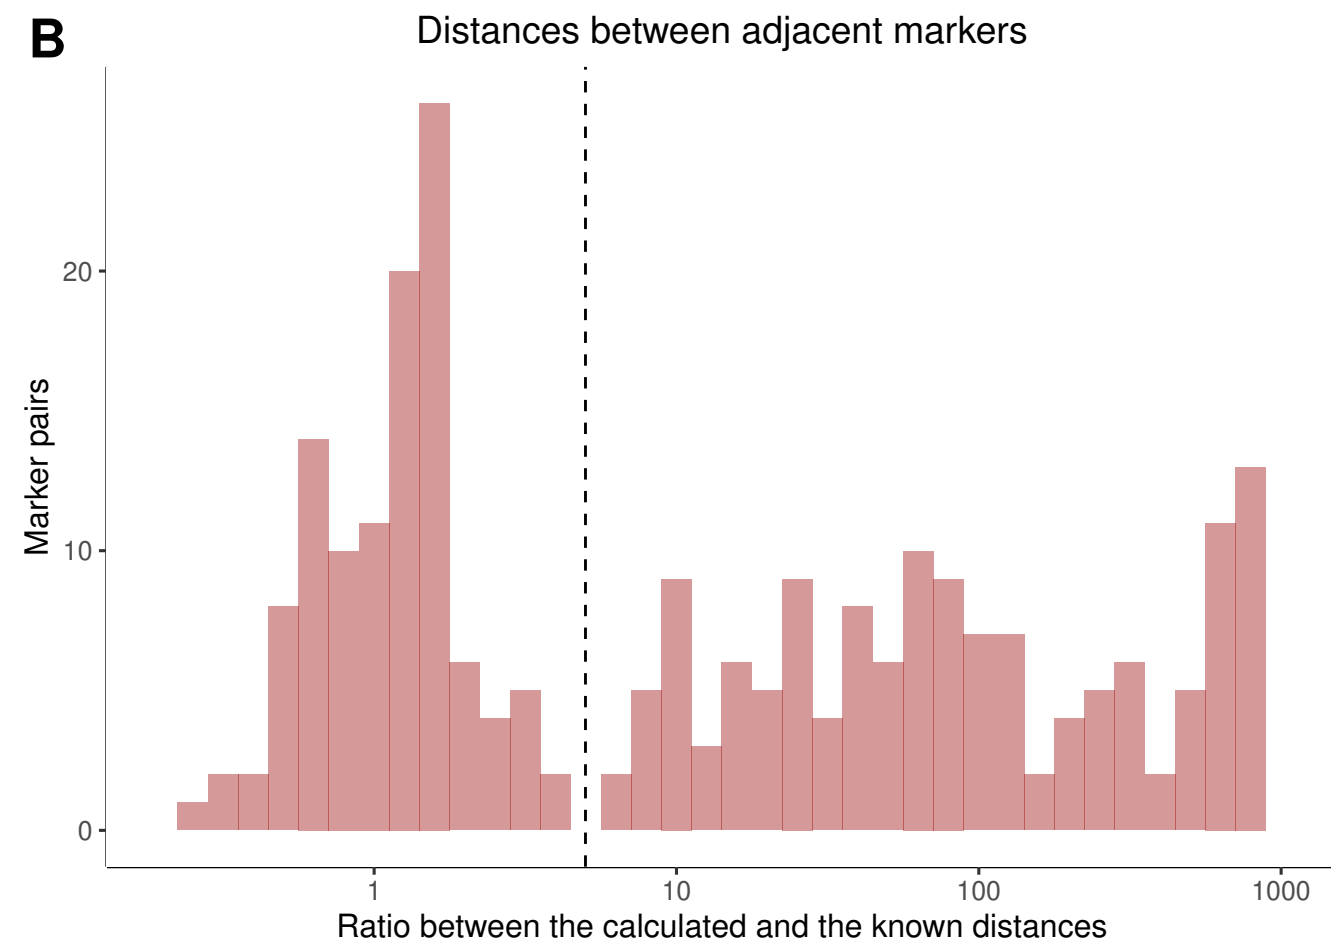**C**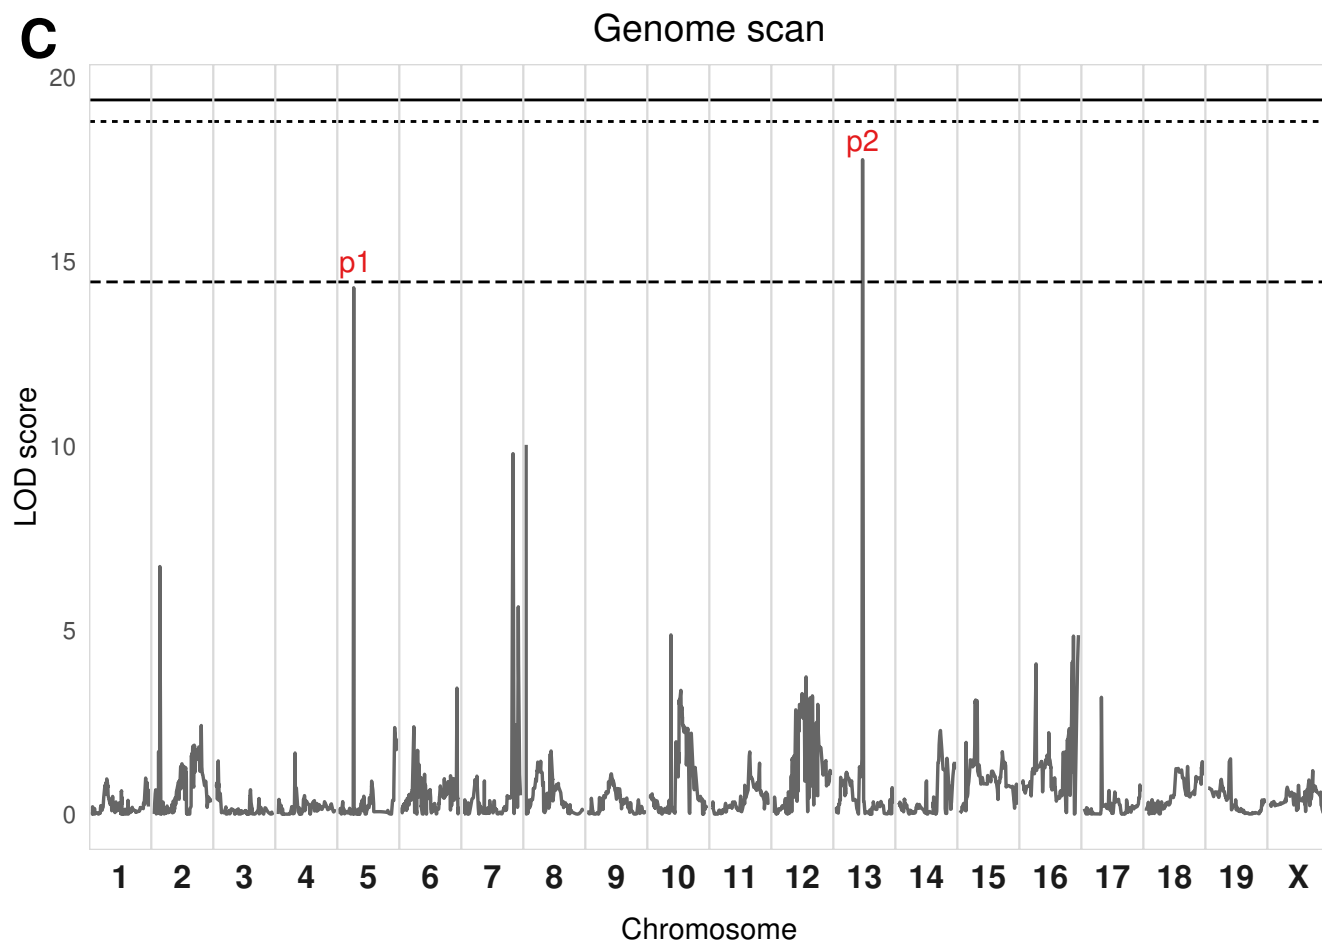**D**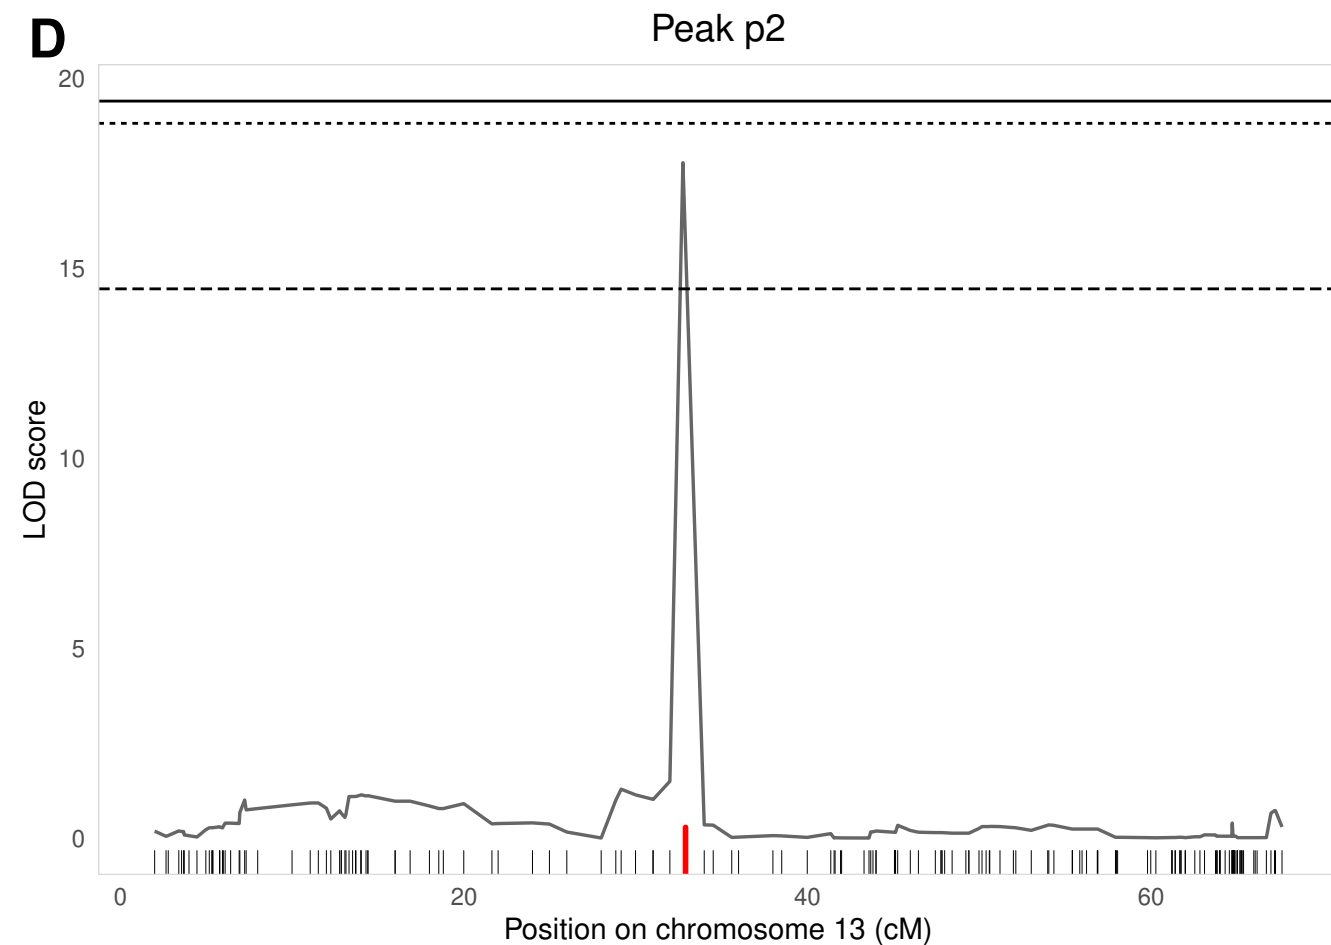

**A**

# Proportion of missing genotypes

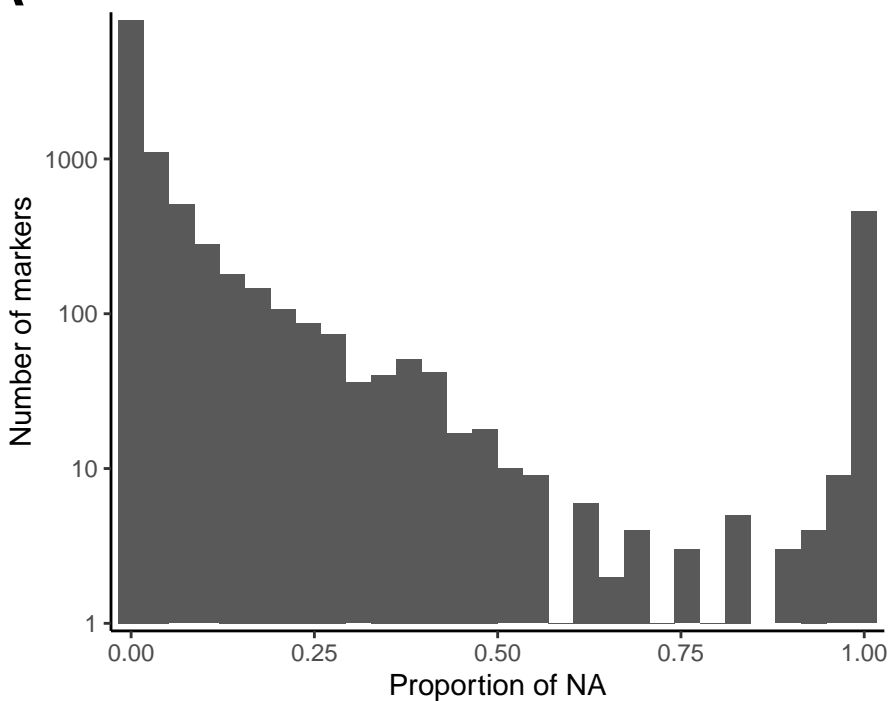**B**

# Exclusion of markers by mark\_prop()

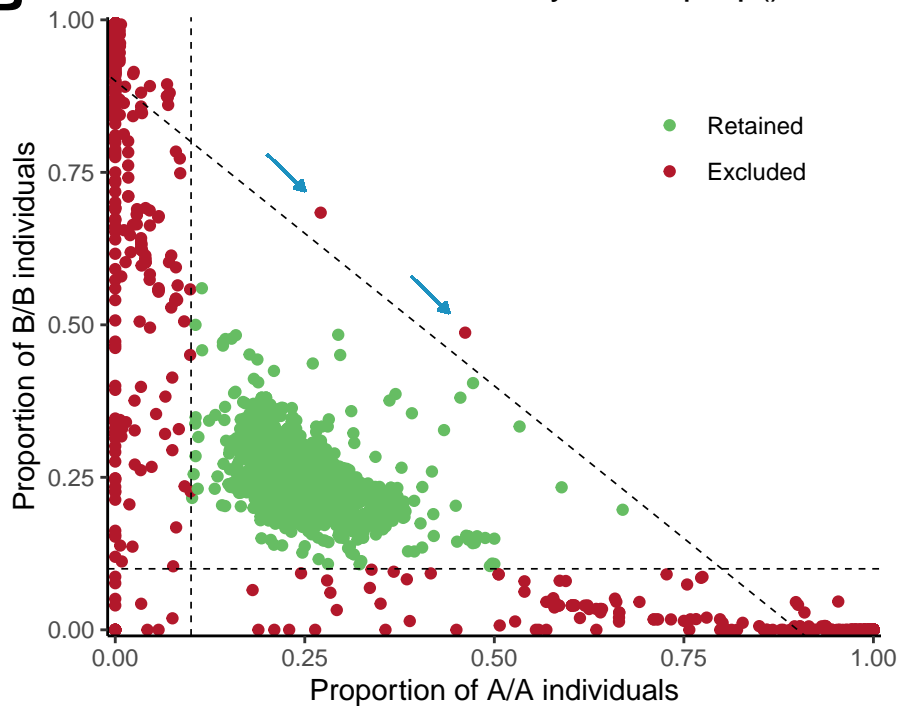

**A**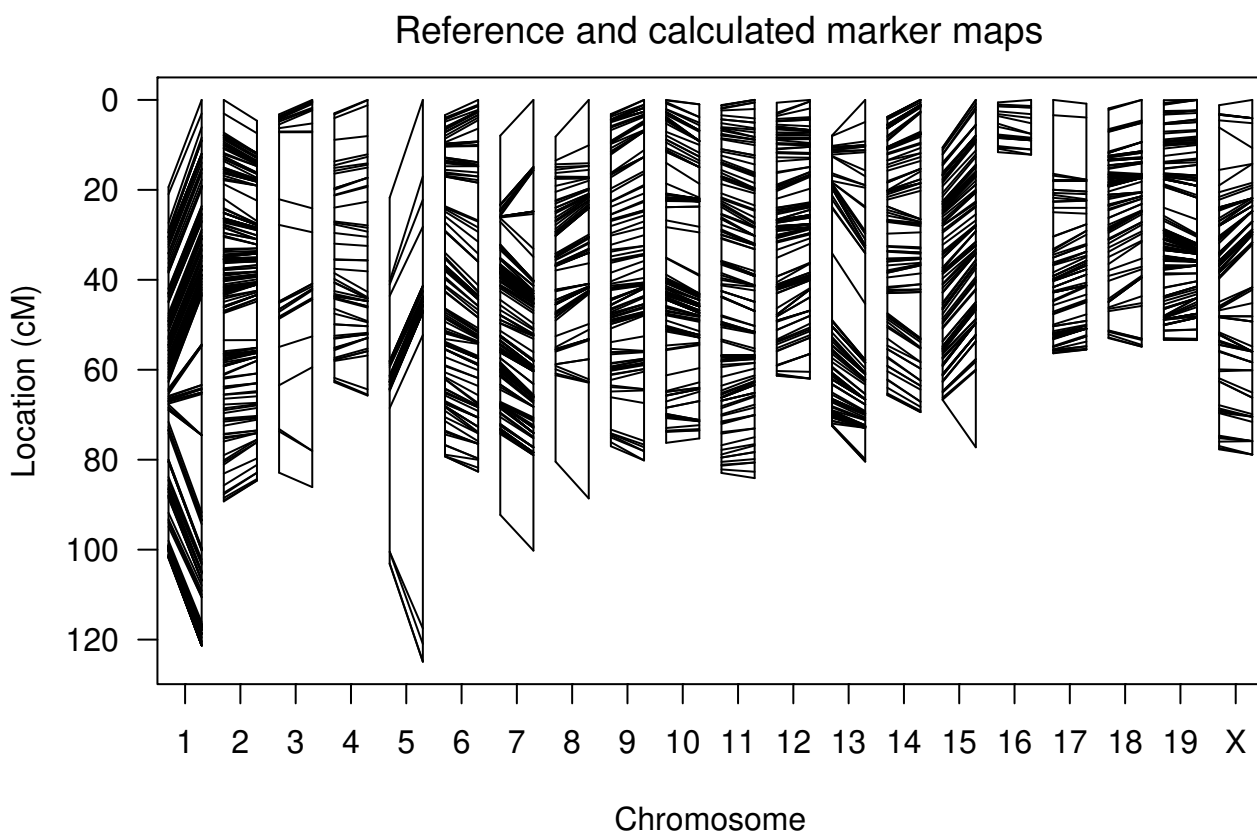**B**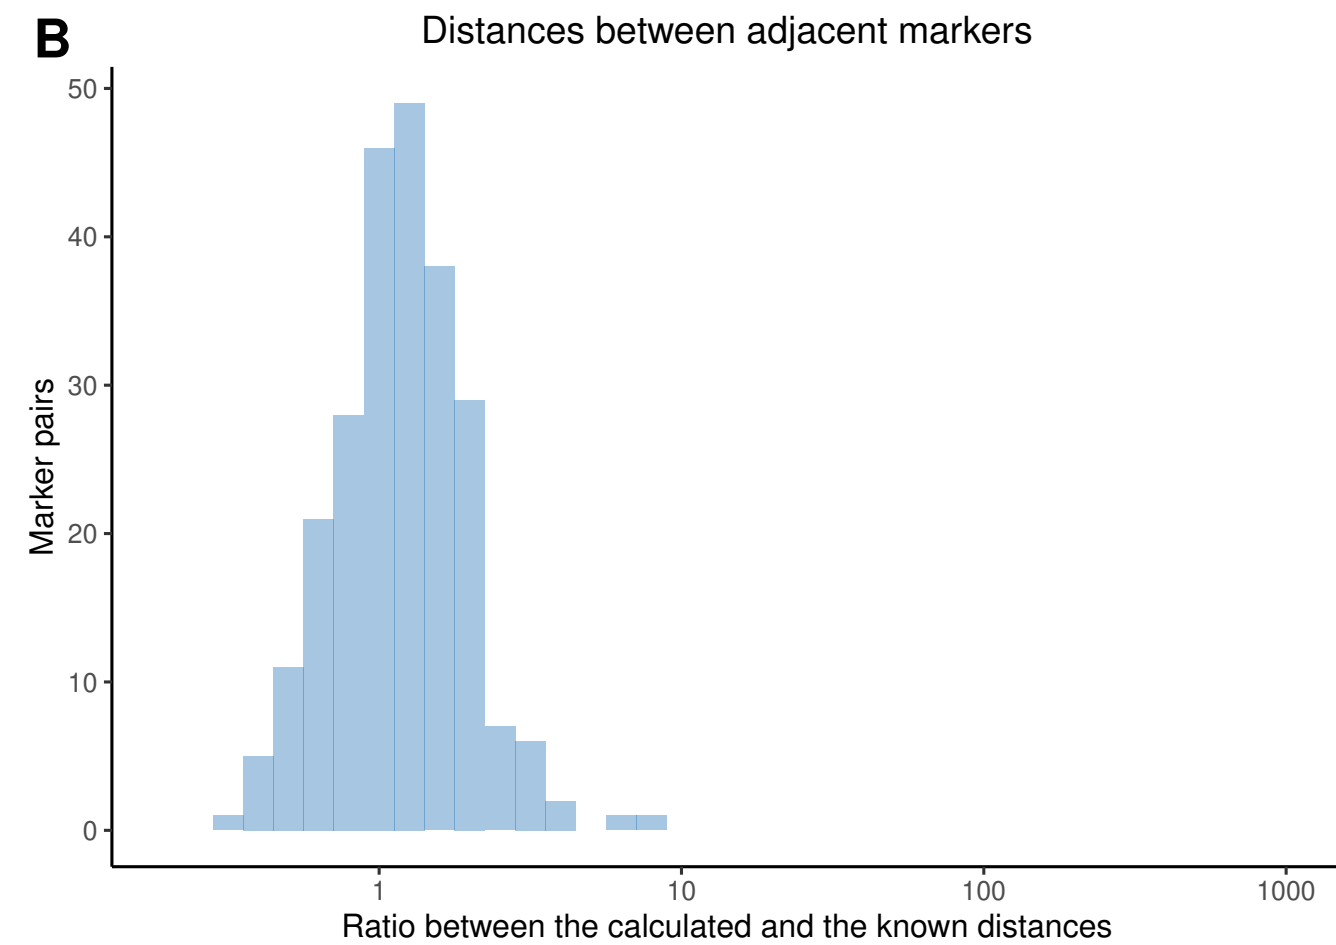**C**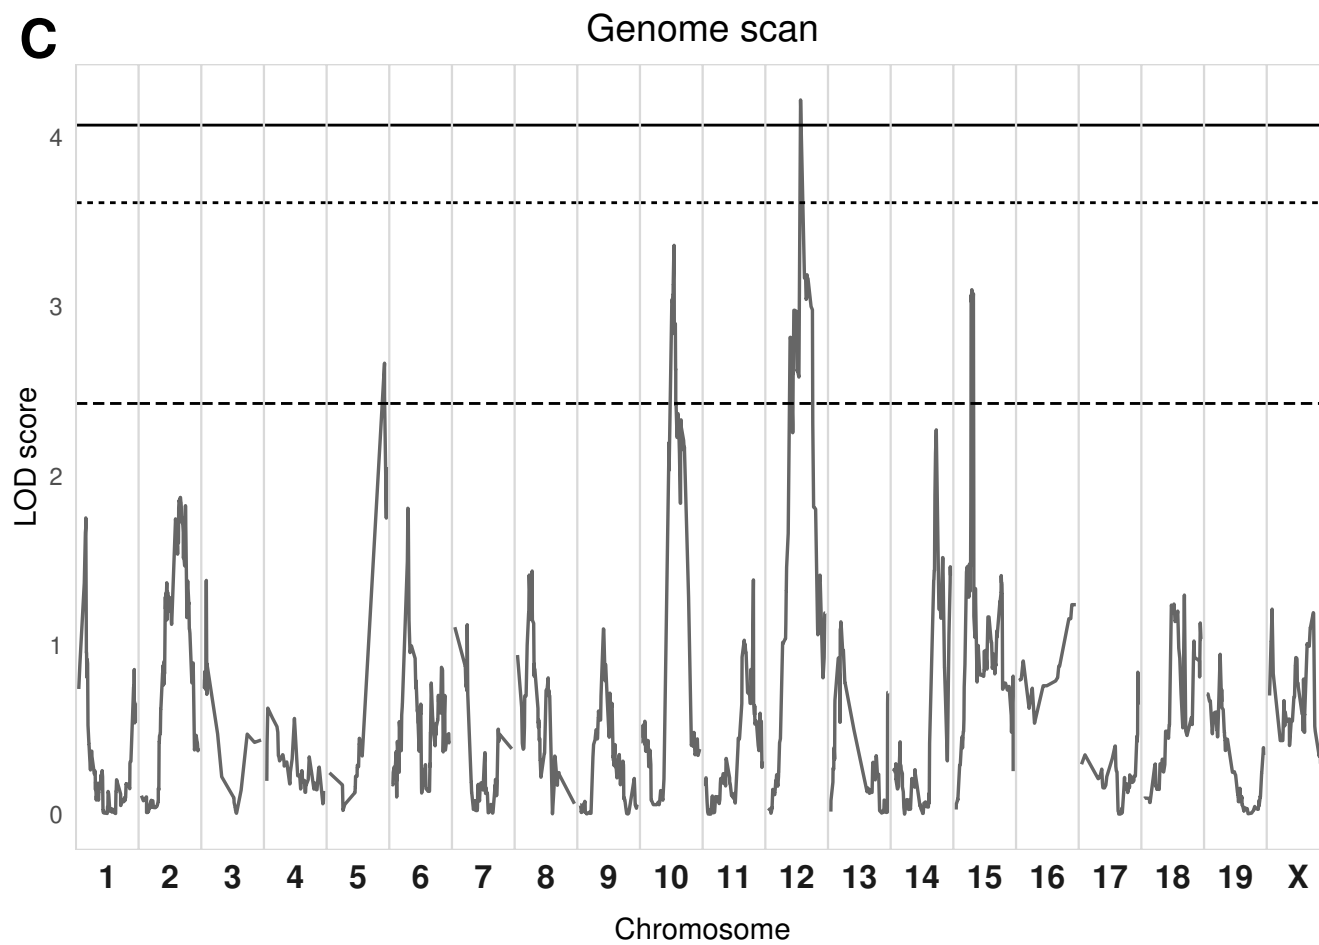**D**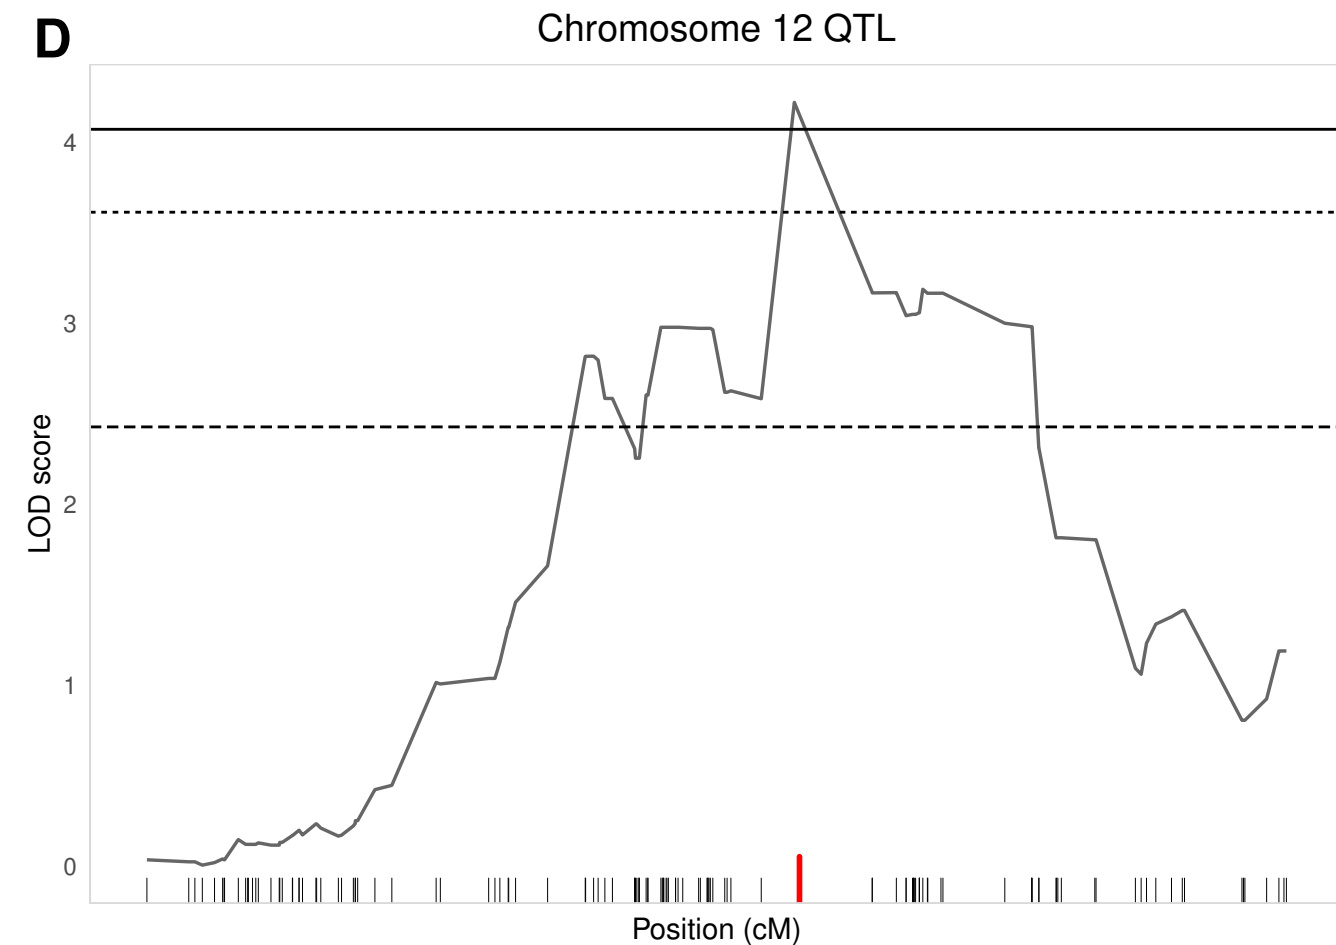

Source: http://biorxiv.org/content/10.1101/2022.07.06.498978v1.full.pdf
